# Supplementary material
Source: PubMed Central journal article supplement (PMC2803150)
Supplement: en.2009-0876_1.pdf [file en.2009-0876_1.pdf]

**Supplementary Figure 1. P-Sel immunolabelling in lung of ER-KO animals.** Lung tissue from CAR-treated (A) ER $\alpha$ - or (B) ER $\beta$ -KO mice either sham, ovx or ovx+E<sub>2</sub> were analysed by IHC with specific antibody against P-Sel. (C) Immunohistochemistry for P-Sel in lung sections from ER $\alpha$ - and ER $\beta$ -KO untreated mice. Representative IHC images are shown. (D) Densitometry evaluation of P-Sel immunolabelling in wt, ER $\alpha$ - and ER $\beta$ -KO mice. Data are expressed as means of % of total tissue area +/- s.e.m. \* vs sham, ^ vs ovx; ° vs the corresponding treatment in wt. \*, ^  $P < 0.05$ ; \*\*, ^^, °°  $P < 0.01$ ; \*\*\*, °°°, ^^°  $P < 0.001$ .

**Supplementary Figure 2. TNF $\alpha$  immunolabelling in lung of ER-KO animals.** Representative IHC images of lung tissue analysed with a specific antibody against TNF $\alpha$  in CAR-treated (A) ER $\alpha$ - and (B) ER $\beta$ -KO mice, either sham, ovx or ovx+ E<sub>2</sub> or (C) in untreated mice.

**Supplementary Figure 3. IL1- $\beta$  immunolabelling in lung of ER-KO animals.** Representative IHC images of lung tissue analysed with a specific antibody against IL1- $\beta$  in CAR-treated (A) ER $\alpha$ - and ER $\beta$ -KO mice, either sham, ovx or ovx+ E<sub>2</sub> or (C) in untreated mice. (D) Densitometry evaluation of IL1- $\beta$  immunolabelling in wt, ER $\alpha$ - and ER $\beta$ -KO mice. Data are expressed as means of % of total tissue area +/- s.e.m. \* vs sham, ^ vs ovx; ° vs the corresponding treatment in wt. \*, ^  $P < 0.05$ ; \*\*, ^^, °°  $P < 0.01$ ; \*\*\*, °°°, ^^°  $P < 0.001$ .

**Supplementary Figure 4. Nitrotyrosine immunolabelling in lung of ER-KO animals.** Representative IHC images of lung tissue analysed with a specific antibody against nitrotyrosine residues in CAR-treated (A) ER $\alpha$ - and (B) ER $\beta$ -KO mice, either sham, ovx or ovx+ E<sub>2</sub> or (C) in untreated mice.

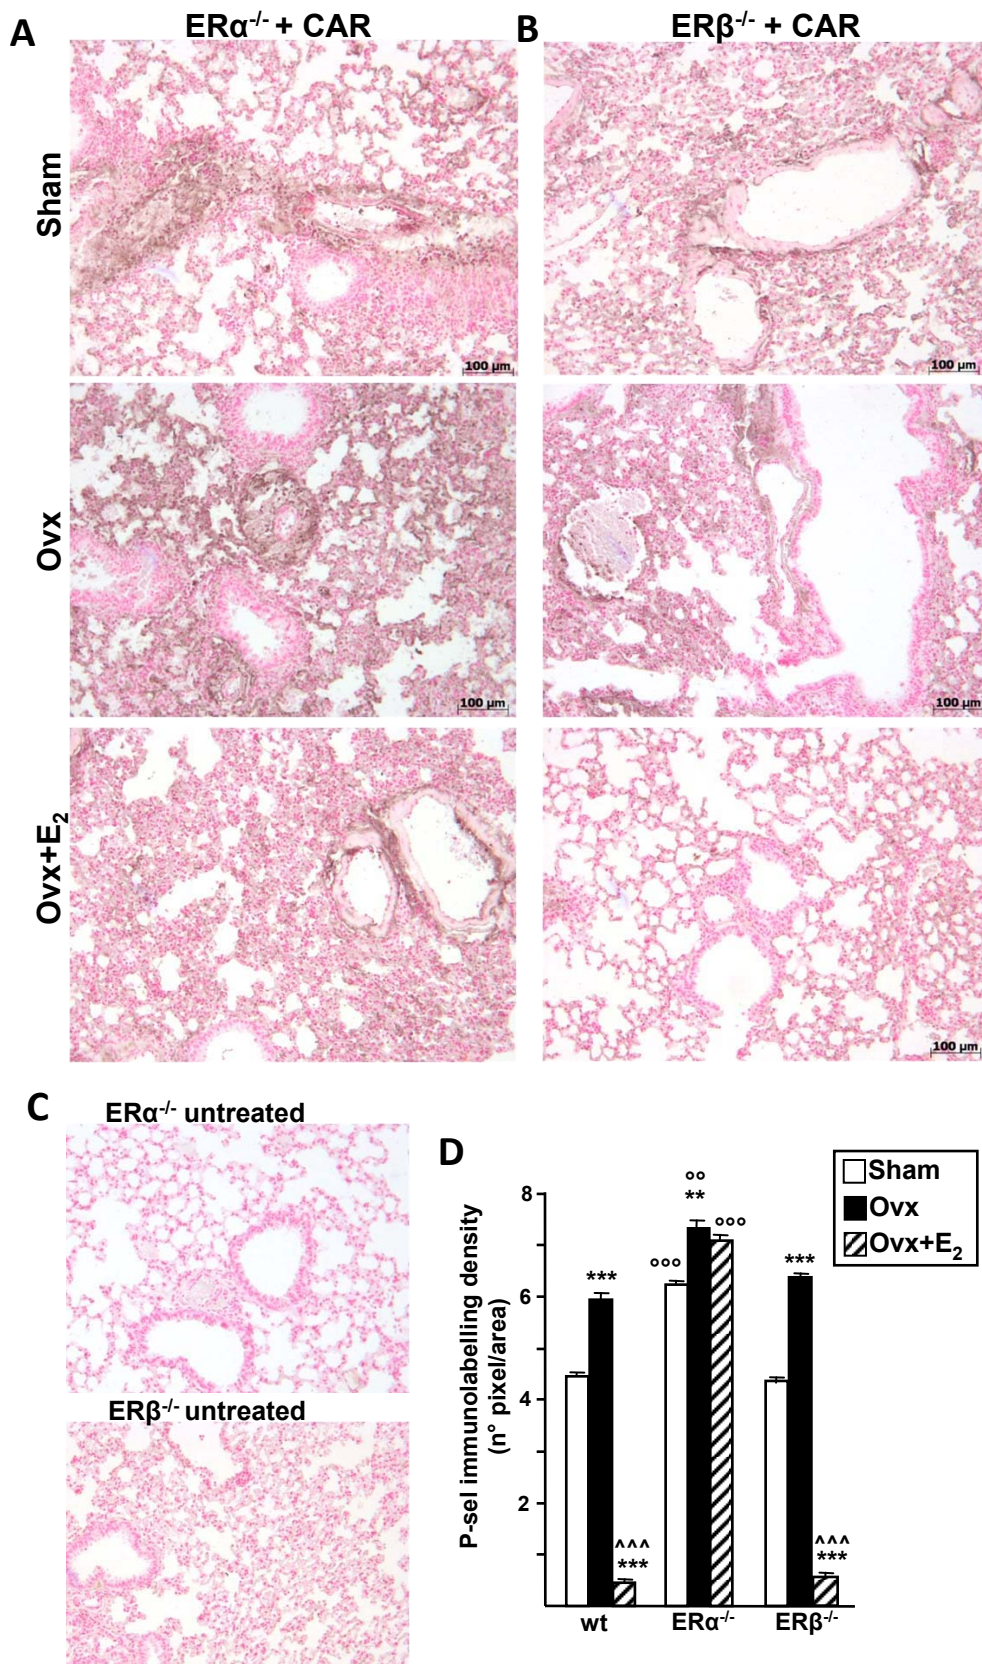

Suppl Figure 1. P-Sel IHC and densitometry

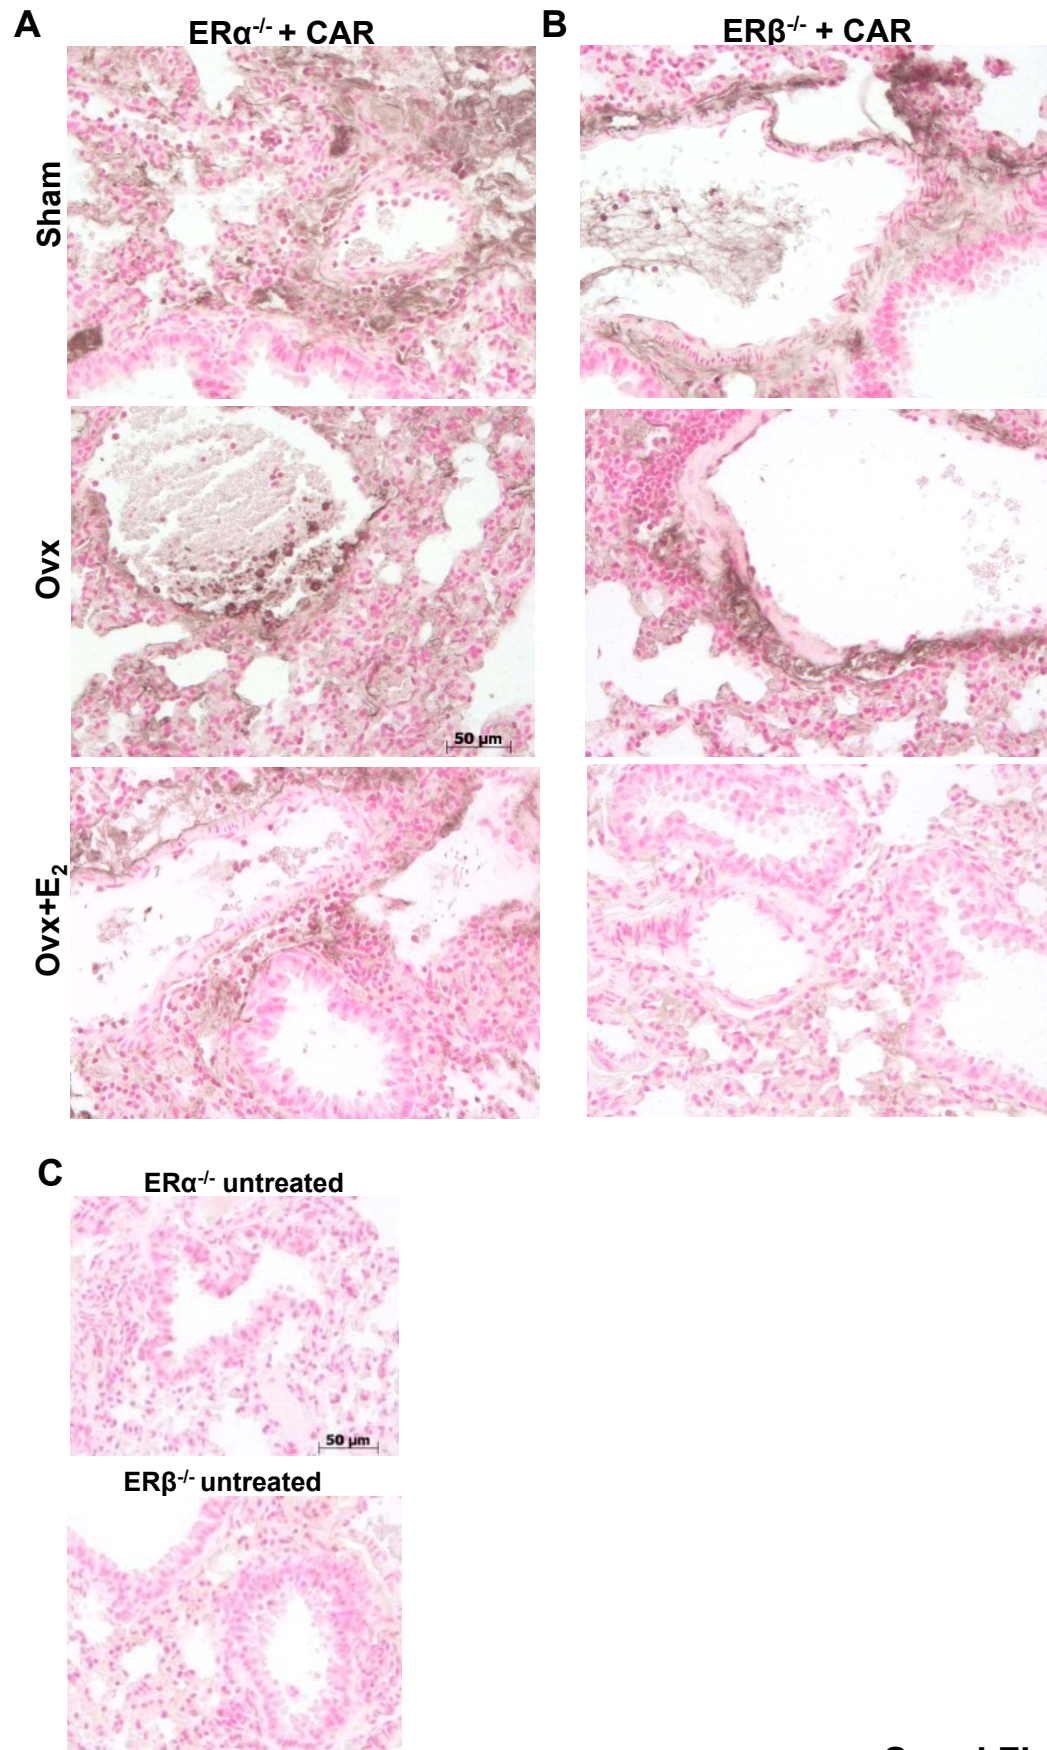

Suppl Fig.2 TNF $\alpha$  IHC

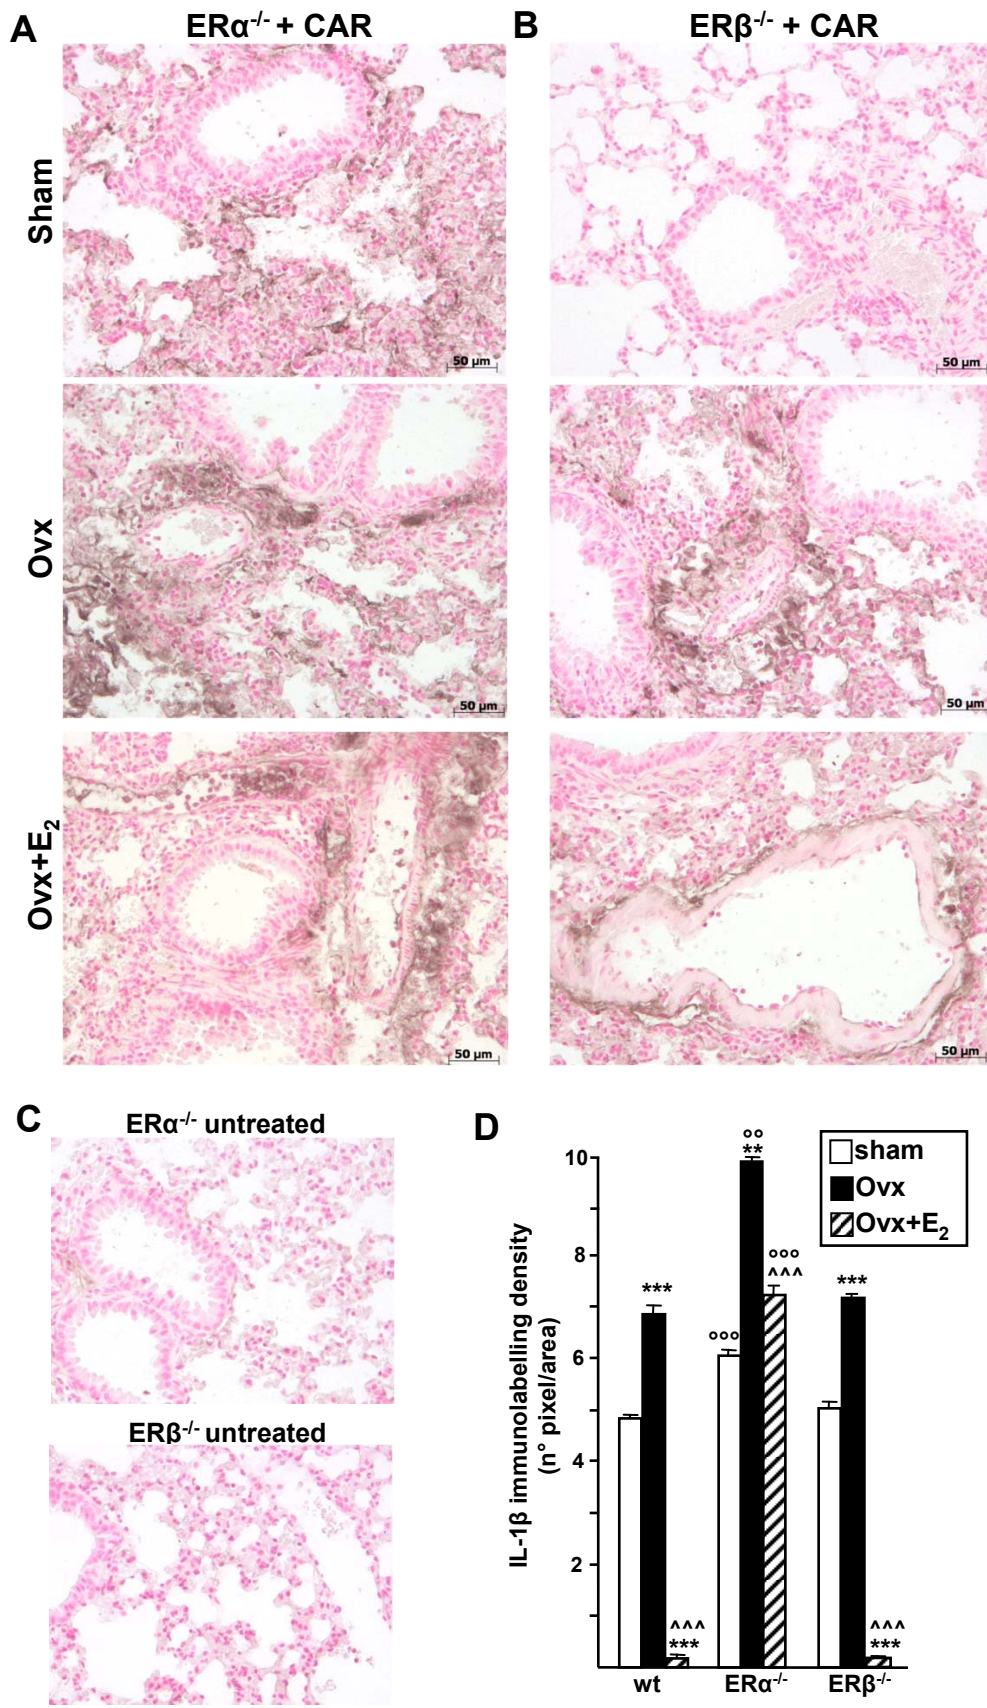

Suppl Figure 3. IHC IL-1 $\beta$  and densitometry

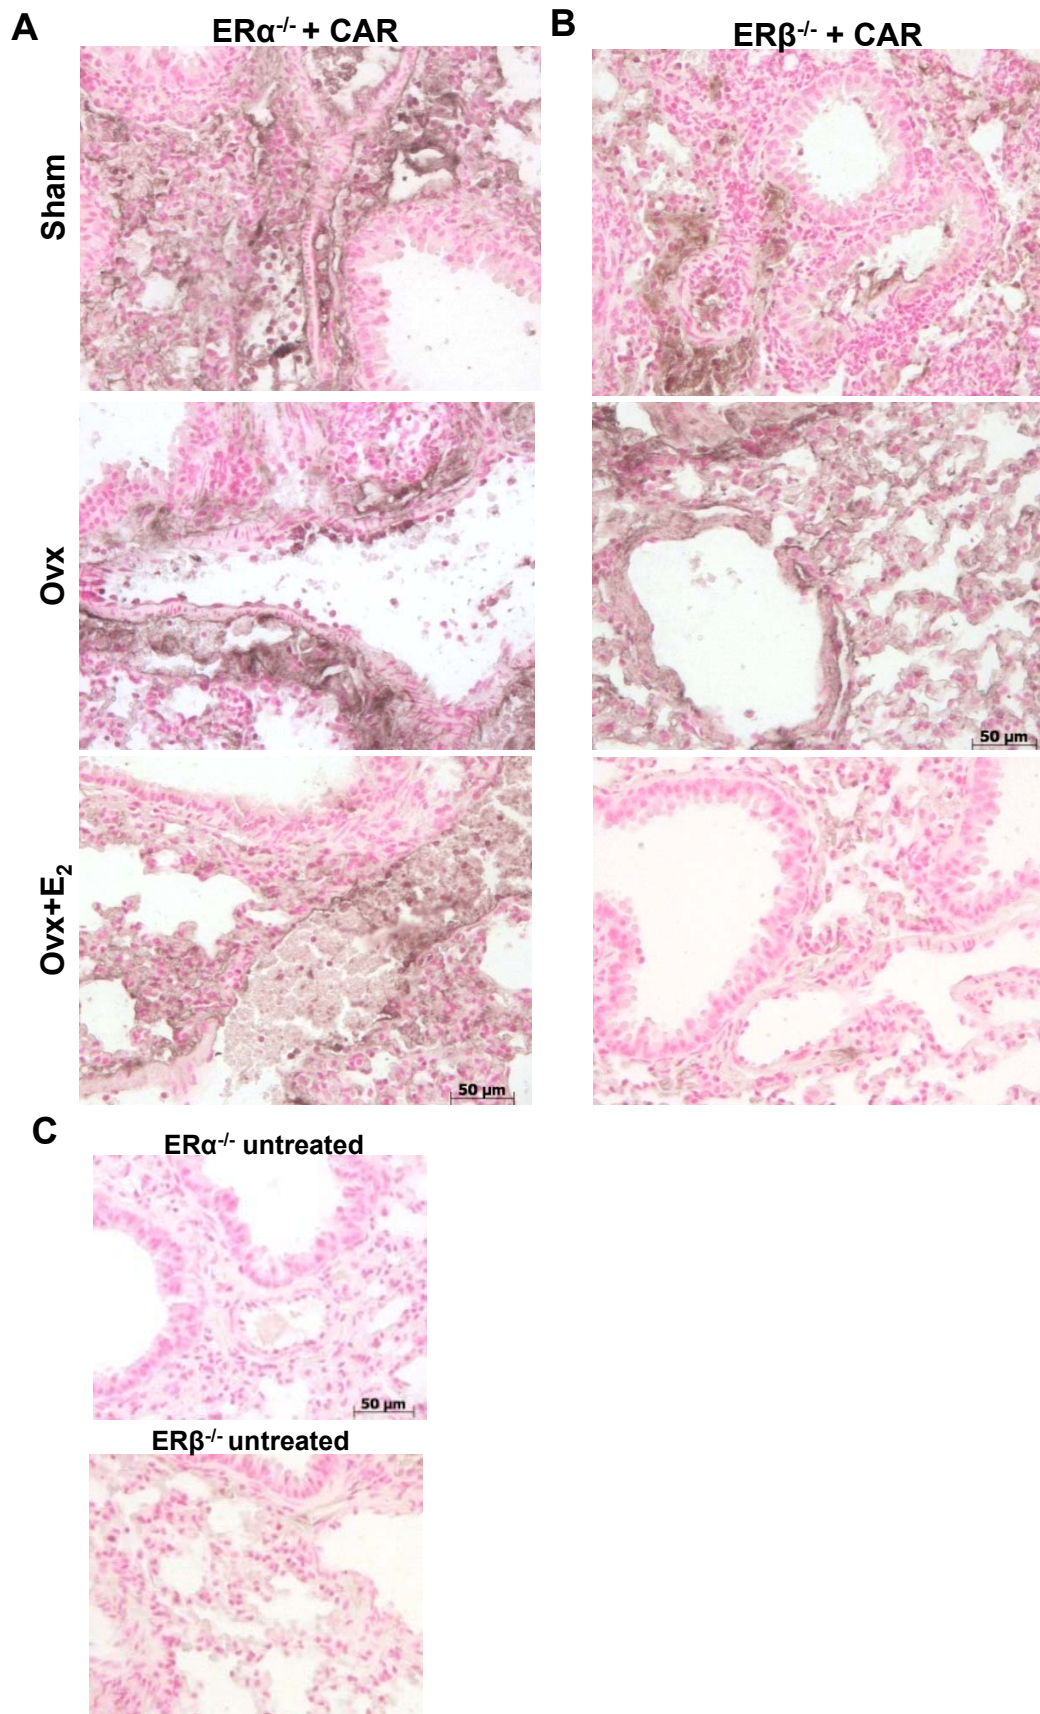

**Suppl. Fig. 4 Nitrotyrosine IHC**
